# Supplementary material for: Lives versus Livelihoods? Perceived economic risk has a stronger association with support for COVID-19 preventive measures than perceived health risk
Source: PubMed Central journal article supplement (PMC8102566; doi:10.1038/s41598-021-88314-4), 2021-05-06

Linear mixed model fit by REML. t-tests use Satterthwaite's method ['lmerModLmerTest']

Formula: Hand\_wash ~ 1 + control + Health\_Risk + Economic\_Risk + Health\_Risk \*

Economic\_Risk + Exposure\_COVID + Know\_COVID19 + Know\_Economic +  
Quality\_Messages + Community\_Norms + Age + Gender + Education +  
Employment + Financial\_Insecurity + COUNTRYTot\_Population +  
COUNTRYGDPpc + COUNTRYUnemployment + COUNTRYGini +  
COUNTRYOld\_age\_dependency +  
COUNTRYLife\_expectancy + COUNTRYHealth\_expenditure +  
COUNTRYPrivate\_health\_insurance +  
COUNTRYOut\_of\_pocket + COUNTRYHospital\_beds + (1 + Health\_Risk + Economic\_Risk |  
Country)

Data: Model\_no\_group

Control: lmerControl(optimizer = "Nelder\_Mead", optCtrl = list(maxfun = 40000))

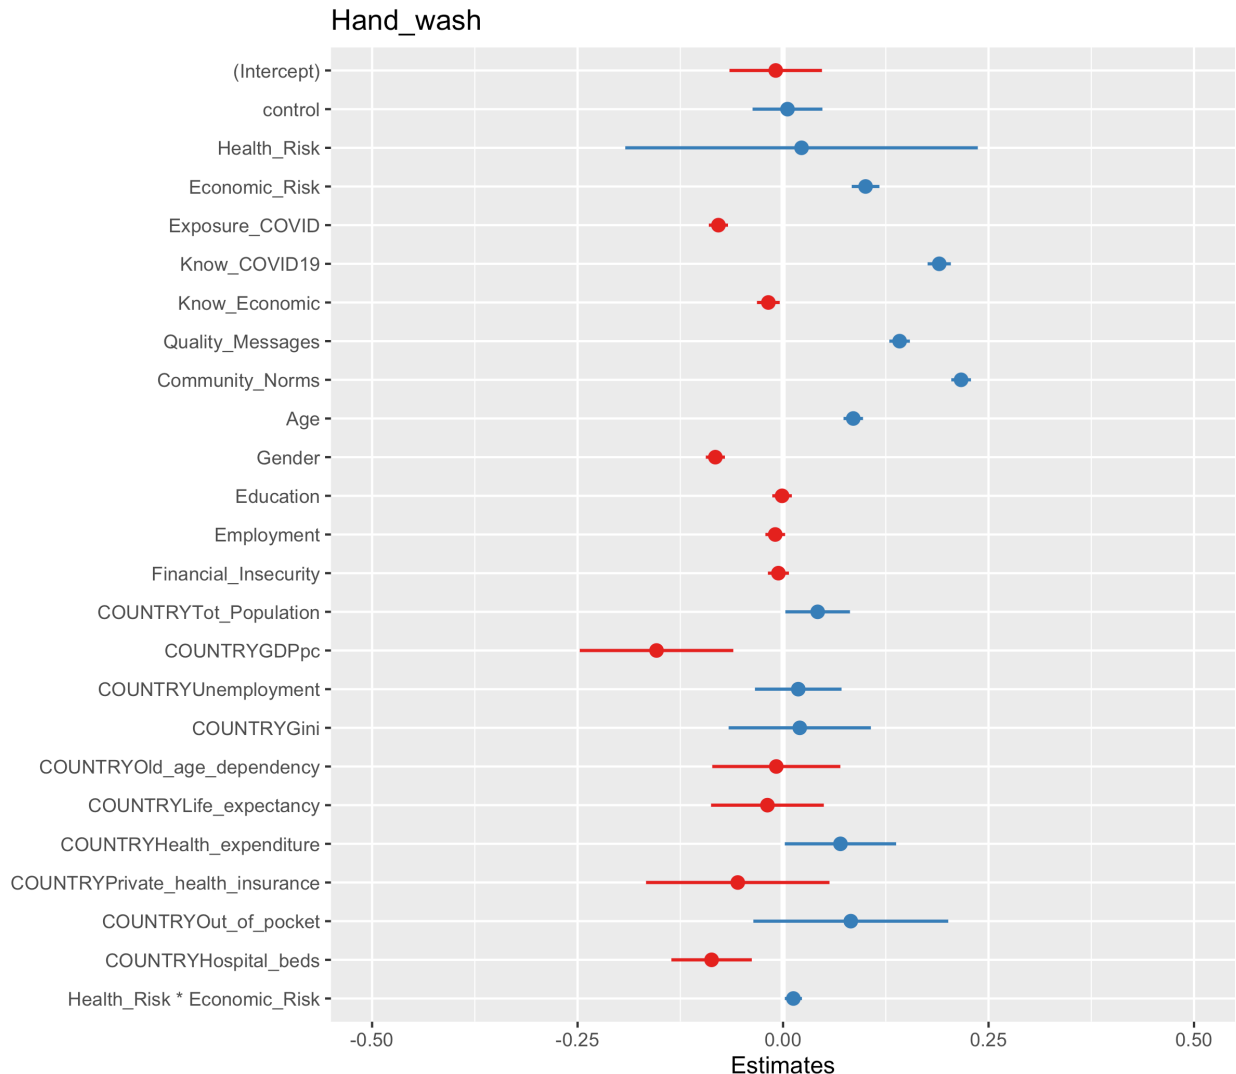

### Random effects

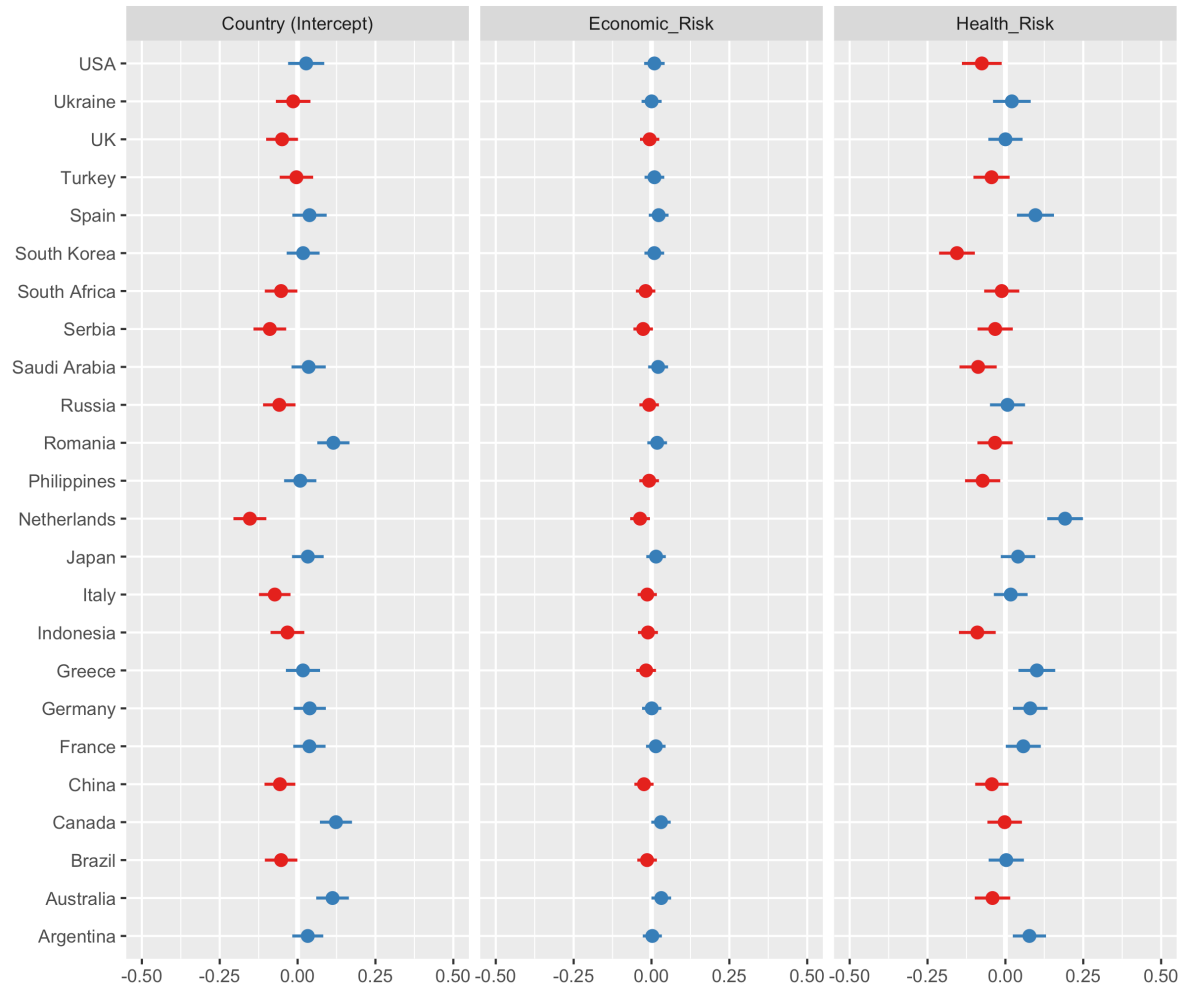

Supplement: 41598_2021_88314_MOESM2_ESM.pdf [file 41598_2021_88314_MOESM2_ESM.pdf]
