# Supplementary material for: Lives versus Livelihoods? Perceived economic risk has a stronger association with support for COVID-19 preventive measures than perceived health risk
Source: PubMed Central journal article supplement (PMC8102566; doi:10.1038/s41598-021-88314-4), 2021-05-06
Supplement: 41598_2021_88314_MOESM3_ESM.pdf [file 41598_2021_88314_MOESM3_ESM.pdf]

## Supplementary Materials

### Lives versus livelihoods? Perceived economic risk has a stronger association with COVID-19 protective measures than perceived health risk

Claudia F. Nisa<sup>1\*</sup>, Jocelyn J. Bélanger<sup>1</sup>, Daiane G. Faller<sup>1</sup>, Nicholas R. Buttrick<sup>2</sup>, Jochen O. Mierau<sup>3</sup>, Maura Austin<sup>2</sup>, Birga M. Schumpe<sup>4</sup>, Edyta M. Sasin<sup>1</sup>, Maximilian Agostini<sup>3</sup>, Ben Gützkow<sup>3</sup>, Jannis Kreienkamp<sup>3</sup>, PsyCorona Collaboration, N. P. Leander<sup>3</sup>

<sup>1</sup> New York University Abu Dhabi, Department of Psychology, UAE

<sup>2</sup> University of Virginia, Department of Psychology, USA

<sup>3</sup> University of Groningen, The Netherlands

<sup>4</sup> University of Amsterdam, The Netherlands

Names and Affiliations detailed in the paper for PsyCorona Collaboration

\* Corresponding Author: [cfn1@nyu.edu](mailto:cfn1@nyu.edu). New York University Abu Dhabi, Department of Psychology, Saadiyat Island, PO BOX 129188, UAE

#### Supplementary Tables

|                                                                                             |    |
|---------------------------------------------------------------------------------------------|----|
| <b>Table S1.</b> Description of variables included, scales used and sources -----           | 2  |
| <b>Table S2.</b> Sample Description -----                                                   | 5  |
| <b>Table S3.</b> Summary statistics for risk perceptions -----                              | 9  |
| <b>Table S4.</b> Summary statistics for primary and secondary outcomes (means) -----        | 13 |
| <b>Table S5.</b> Summary statistics for primary and secondary outcomes (%) -----            | 14 |
| <b>Table S6.</b> Multilevel Regression Modeling: Preventive Health Behaviors -----          | 16 |
| <b>Table S7.</b> Multilevel Regression Modeling: Support for Strict Containment Measures -- | 17 |
| <b>Table S8.</b> Sensitivity Analysis -----                                                 | 18 |
| <b>Table S9.</b> Fixed-effects Model -----                                                  | 19 |
| <b>Table S10.</b> LASSO Model -----                                                         | 20 |

#### Supplementary Figures

|                                                                                                |    |
|------------------------------------------------------------------------------------------------|----|
| <b>Figure S1.</b> Standardized health perceived risk per country -----                         | 10 |
| <b>Figure S2.</b> Standardized economic perceived risk per country -----                       | 10 |
| <b>Figure S3.</b> Perceived health and economic risk per sociodemographic groups -----         | 11 |
| <b>Figure S4.</b> Association between health and economic risk, and each of the six outcomes - | 15 |

**Table S1.** Description of variables included, scales used and sources

| <b>Variable</b>                      | <b>Description</b>                                                                                                                                                                                                                                                                                       | <b>Source</b>        |
|--------------------------------------|----------------------------------------------------------------------------------------------------------------------------------------------------------------------------------------------------------------------------------------------------------------------------------------------------------|----------------------|
| <b>Main Predictors</b>               |                                                                                                                                                                                                                                                                                                          |                      |
| Likelihood to get coronavirus        | How likely is it that in the next few months you will get infected with coronavirus [ <i>1- Exceptionally unlikely; 2- Very Unlikely; 3- Unlikely; 4- About equally likely; 5- Likely; 6- Very likely; 7- All but certain; 8=Already happened</i> ]                                                      | Survey               |
| Likelihood to suffer economic losses | How likely is it that in the next few months your personal situation will get worse due to economic consequences of coronavirus [ <i>1- Exceptionally unlikely; 2- Very Unlikely; 3- Unlikely; 4- About equally likely; 5- Likely; 6- Very likely; 7- All but certain; 8=Already happened</i> ]          | Survey               |
| Interaction Effect                   | Likelihood to get coronavirus* Likelihood to suffer economic losses                                                                                                                                                                                                                                      | Computed from survey |
| <b>Outcome variables</b>             |                                                                                                                                                                                                                                                                                                          |                      |
| Health behavior: Wash hands          | To minimize my chances of getting coronavirus, I wash my hands more often [ <i>-3 Strongly disagree; -2 Disagree; -1 Somewhat disagree; 0 Neither agree nor disagree; 1 Somewhat agree; 2 Agree; 3 Strongly agree</i> ]                                                                                  | Survey               |
| Health behavior: Avoid Crowds        | To minimize my chances of getting coronavirus, I avoid crowded spaces [ <i>-3 Strongly disagree; -2 Disagree; -1 Somewhat disagree; 0 Neither agree nor disagree; 1 Somewhat agree; 2 Agree; 3 Strongly agree</i> ]                                                                                      | Survey               |
| Health behavior: Social Isolation    | In the past 7 days, how much face-to-face social contact have you had with people who live outside your household, namely friends or relatives, in the past 7 days? [ <i>from 0 days to 7 days</i> ]<br>Note: Items reversed to represent isolation (i.e., number of days per week in social isolation). | Survey               |
| Support for Mandatory Vaccination    | I would sign a petition that supports mandatory vaccination once a vaccine has been developed for coronavirus [ <i>-3 Strongly disagree; -2 Disagree; -1 Somewhat disagree; 0 Neither agree nor disagree; 1 Somewhat agree; 2 Agree; 3 Strongly agree</i> ]                                              | Survey               |
| Support for Mandatory Quarantine     | I would sign a petition that supports mandatory quarantine for those that have coronavirus and those that have been exposed to the virus [ <i>-3 Strongly disagree; -2 Disagree; -1 Somewhat disagree; 0 Neither agree nor disagree; 1 Somewhat agree; 2 Agree; 3 Strongly agree</i> ]                   | Survey               |
| Support for Suspected Case Report    | I would sign a petition that supports reporting people who are suspected to have coronavirus [ <i>-3 Strongly disagree; -2 Disagree; -1 Somewhat disagree; 0 Neither agree nor disagree; 1 Somewhat agree; 2 Agree; 3 Strongly agree</i> ]                                                               | Survey               |
| <b>Individual Level Covariates</b>   |                                                                                                                                                                                                                                                                                                          |                      |
| Gender                               | 1-Female; 2-Male                                                                                                                                                                                                                                                                                         | Survey               |

|                                    |                                                                                                                                                                                                                                                         |                             |
|------------------------------------|---------------------------------------------------------------------------------------------------------------------------------------------------------------------------------------------------------------------------------------------------------|-----------------------------|
| Age                                | Categories 1- 18 to 24; 2 – 25 to 34; 3- 35 to 44; 4- 45-54; 5- 55-64; 6-65+                                                                                                                                                                            | Survey                      |
| Education                          | Categories 1- Primary education; 2- General secondary education; 3- Vocational education; 4- Higher education; 5- Bachelor's degree; 6- Master's degree; 7- PhD degree                                                                                  | Survey                      |
| Political Ideology                 | 1- Left side of the political spectrum; 2=Right side of the political spectrum                                                                                                                                                                          | Survey                      |
| Employment                         | 1- Employed (part-time or full-time); 0-Not employed                                                                                                                                                                                                    | Survey                      |
| Financial Insecurity               | Due to my financial situation, I have difficulties paying for my expenses [-2 <i>Strongly disagree</i> ; -1 <i>Disagree</i> ; 0 <i>Neither agree nor disagree</i> ; 1 <i>Agree</i> ; 2 <i>Strongly agree</i> ]                                          | Survey                      |
| Exposure COVID-19 personal network | Do you know someone who has been infected with coronavirus? Possible answers: (i) a family member, (ii) a close friend, (iii) someone else [ <i>answer yes/no: sum of answers reported in database</i> ]                                                | Survey                      |
| Knowledge COVID-19                 | How knowledgeable are you about the recent outbreak of CoVID-19, commonly referred to as the Coronavirus? [ <i>1- Not at all knowledgeable; 2-Slightly knowledgeable; 3-Moderately knowledgeable; 4-Very knowledgeable; 5-Extremely knowledgeable</i> ] | Survey                      |
| Knowledge Economic consequences    | How knowledgeable are you about the potential economic and financial consequences of coronavirus? [ <i>1- Not at all knowledgeable; 2-Slightly knowledgeable; 3-Moderately knowledgeable; 4-Very knowledgeable; 5-Extremely knowledgeable</i> ]         | Survey                      |
| Quality Message                    | To what extent are you getting clear, unambiguous messages about what to do about the Coronavirus? [ <i>1- Messages are completely unclear/ambiguous to 6- Messages are very clear/unambiguous</i> ]                                                    | Survey                      |
| Community Norms                    | Right now, people in my area do self-isolate and engage in social distancing [ <i>-3 Strongly disagree; -2 Disagree; -1 Somewhat disagree; 0 Neither agree nor disagree; 1 Somewhat agree; 2 Agree; 3 Strongly agree</i> ]                              | Survey                      |
| <b>Country Level Covariates</b>    |                                                                                                                                                                                                                                                         |                             |
| Population                         | Total Population as per last available data in millions.                                                                                                                                                                                                | World Bank                  |
| GDP per capita                     | GDP per capita (current \$US). GDP per capita is a measure of a country's economic output that accounts for its number of people.                                                                                                                       | Work Bank                   |
| Unemployment Rate                  | Unemployment rate, projections for 2020 based on the first trimester of 2020. The unemployment rate is the share of the labor force that is jobless, expressed as a percentage.                                                                         | International Monetary Fund |
| Old age dependency ratio           | Age dependency ratio, 65 and above. The demographic old-age dependency ratio is defined as the number of individuals aged 65                                                                                                                            | Work Bank                   |

|                            |                                                                                                                                                                                                                                                                                                                                                                                                                                                                                 |                   |
|----------------------------|---------------------------------------------------------------------------------------------------------------------------------------------------------------------------------------------------------------------------------------------------------------------------------------------------------------------------------------------------------------------------------------------------------------------------------------------------------------------------------|-------------------|
|                            | and over per 100 people of working age defined as those aged between 20 and 64.                                                                                                                                                                                                                                                                                                                                                                                                 |                   |
| Gini Index                 | The Gini index measures the extent to which the distribution of income (or, in some cases, consumption expenditure) among individuals or households within an economy deviates from a perfectly equal distribution.                                                                                                                                                                                                                                                             | Work Bank         |
| Life Expectancy            | Life expectancy at birth in years. Average number of years that a newborn is expected to live if current mortality rates continue to apply.                                                                                                                                                                                                                                                                                                                                     | World Bank        |
| Health expenditure         | Current health expenditure (as % of GDP). General government health expenditure and private health expenditure in a given year, calculated as percentage of the GDP.                                                                                                                                                                                                                                                                                                            | Work Bank         |
| Private Health Expenditure | Domestic private health expenditure (% of current health expenditure). Share of current health expenditures funded from domestic private sources. Domestic private sources include funds from households, corporations and non-profit organizations. Such expenditures can be either prepaid to voluntary health insurance or paid directly to healthcare providers.                                                                                                            | Work Bank         |
| Out-of-pocket payments     | Out-of-pocket payments (as % of current health expenditure). Out-of-pocket payments are defined as direct payments made by individuals to health care providers at the time of service use. This excludes any prepayment for health services, and it relies on user fees.                                                                                                                                                                                                       | Work Bank         |
| Hospital Beds              | Hospital beds (per 1,000 people).                                                                                                                                                                                                                                                                                                                                                                                                                                               | Work Bank         |
| Cases per million          | Confirmed COVID-19 cases per million people. Point estimate selected when data collection reached 50% of sample size completion each country. This corresponded to April 12 <sup>th</sup> for Argentina, Brazil, Canada, France, Germany, Italy, Japan, South Africa, Spain, Turkey, UK and USA. This corresponded to April 20 <sup>th</sup> for Australia, China, Greece, Indonesia, Netherlands, Philippines, Romania, Russia, Saudi Arabia, Serbia, South Korea and Ukraine. | Our world in data |
| Deaths per million         | Confirmed COVID-19 deaths per million people. The point estimate selected for the numbers of deaths is equivalent to the description above about the number of cases.                                                                                                                                                                                                                                                                                                           | Our world in data |

**Table S2.** Sample Description

|                            | <b>ARGENTINA</b>                                          | <b>AUSTRALIA</b>                                          | <b>BRAZIL</b>                                             | <b>CANADA</b>                                             | <b>CHINA</b>                                              | <b>FRANCE</b>                                             |
|----------------------------|-----------------------------------------------------------|-----------------------------------------------------------|-----------------------------------------------------------|-----------------------------------------------------------|-----------------------------------------------------------|-----------------------------------------------------------|
| Sample Size                | 1176                                                      | 1030                                                      | 1098                                                      | 1053                                                      | 1174                                                      | 1089                                                      |
| Age                        | 38%18-34;<br>33% 35-54<br>29% 55+                         | 30%18-34<br>38% 35-54<br>32% 55+                          | 42%18-34<br>36% 35-54<br>22% 55+                          | 29%18-34<br>39% 35-54<br>32% 55+                          | 49%18-34<br>51% 35-54<br>0% 55+                           | 26%18-34<br>35% 35-54<br>39% 55+                          |
| Gender (% female)          | 53.2%                                                     | 50.7%                                                     | 53.2%                                                     | 51.3%                                                     | 50.6%                                                     | 52.8%                                                     |
| Education                  | Up to higher<br>education 70%; 30%<br>University degree + | Up to higher<br>education 60%; 40%<br>University degree + | Up to higher<br>education 70%; 30%<br>University degree + | Up to higher<br>education 59%; 41%<br>University degree + | Up to higher<br>education 51%; 49%<br>University degree + | Up to higher<br>education 73%; 27%<br>University degree + |
| Employment Status          | 63% employed                                              | 55% employed                                              | 63% employed                                              | 56% employed                                              | 77% employed                                              | 52% employed                                              |
| Financial Insecurity       | Difficulty pay bills<br>46%                               | Difficulty pay bills<br>30%                               | Difficulty pay bills<br>41%                               | Difficulty pay bills<br>27%                               | Difficulty pay bills<br>22%                               | Difficulty pay bills<br>25%                               |
| Exposure COVID-19          | .17 (.49)                                                 | .12 (.34)                                                 | .29 (.52)                                                 | .16 (.42)                                                 | .18 (.52)                                                 | .43 (.61)                                                 |
| Knowledge COVID-19         | 3.74 (.86)                                                | 3.47 (.82)                                                | 3.89 (.87)                                                | 3.62 (.85)                                                | 3.30 (.76)                                                | 3.82 (.85)                                                |
| Knowledge economic loss    | 3.61 (1.07)                                               | 3.17 (.86)                                                | 3.65 (.94)                                                | 3.29 (.90)                                                | 2.59 (.78)                                                | 3.22 (.99)                                                |
| Quality Messages           | 4.64 (1.39)                                               | 4.20 (1.32)                                               | 4.46 (1.43)                                               | 4.50 (1.27)                                               | 5.10 (.085)                                               | 3.97 (1.51)                                               |
| Community Norms            | 1.94 (1.52)                                               | 1.48 (1.35)                                               | 1.02 (1.70)                                               | 1.60 (1.35)                                               | 1.67 (1.33)                                               | 0.86 (1.59)                                               |
| Total Population           | 44.5                                                      | 24.9                                                      | 209.5                                                     | 37.1                                                      | 1392.7                                                    | 66.9                                                      |
| GDP per capita             | 11684                                                     | 57374                                                     | 8921                                                      | 46233                                                     | 9771                                                      | 41464                                                     |
| Unemployment Rate          | 10.9                                                      | 7.6                                                       | 14.7                                                      | 7.5                                                       | 4.3                                                       | 10.4                                                      |
| Old Age Dependency Ratio   | 17                                                        | 24                                                        | 13                                                        | 26                                                        | 15                                                        | 32                                                        |
| Gini Index                 | 41.4                                                      | 34.4                                                      | 53.9                                                      | 33.8                                                      | 38.5                                                      | 31.6                                                      |
| Life Expectancy            | 77                                                        | 83                                                        | 76                                                        | 82                                                        | 77                                                        | 83                                                        |
| Health Expenditure         | 9.12                                                      | 9.21                                                      | 9.47                                                      | 10.57                                                     | 5.15                                                      | 11.31                                                     |
| Private Health Expenditure | 27.07                                                     | 31.09                                                     | 58.05                                                     | 26.28                                                     | 43.3                                                      | 16.62                                                     |
| Out-of-pocket              | 15.02                                                     | 18.15                                                     | 27.46                                                     | 14.22                                                     | 36.05                                                     | 9.38                                                      |
| Hospital Beds              | 5                                                         | 3.8                                                       | 2.2                                                       | 2.7                                                       | 4.2                                                       | 6.5                                                       |
| COVID-19 Cases             | 44.30                                                     | 257.92                                                    | 91.30                                                     | 584.51                                                    | 58.12                                                     | 1382.90                                                   |
| COVID-19 Deaths            | 1.84                                                      | 2.69                                                      | 4.89                                                      | 15.29                                                     | 3.22                                                      | 200.38                                                    |

**Table S2.** Sample Description (Cont.)

|                            | <b>GERMANY</b>                                      | <b>GREECE</b>                                       | <b>INDONESIA</b>                                    | <b>ITALY</b>                                        | <b>JAPAN</b>                                        | <b>NETHERLANDS</b>                                  |
|----------------------------|-----------------------------------------------------|-----------------------------------------------------|-----------------------------------------------------|-----------------------------------------------------|-----------------------------------------------------|-----------------------------------------------------|
| Sample Size                | 1079                                                | 986                                                 | 954                                                 | 1115                                                | 1089                                                | 1041                                                |
| Age                        | 24%18-34<br>34% 35-54<br>42% 55+                    | 24%18-34<br>38% 35-54<br>38% 55+                    | 47%18-34<br>41% 35-54<br>12% 55+                    | 23%18-34<br>37% 35-54<br>40% 55+                    | 27%18-34<br>31% 35-54<br>42% 55+                    | 26%18-34<br>37% 35-54<br>37% 55+                    |
| Gender (% female)          | 52.4%                                               | 48.2%                                               | 45.4%                                               | 52.3%                                               | 50.4%                                               | 50.7%                                               |
| Education                  | Up to higher education 78%; 22% University degree + | Up to higher education 40%; 60% University degree + | Up to higher education 54%; 46% University degree + | Up to higher education 66%; 34% University degree + | Up to higher education 49%; 51% University degree + | Up to higher education 78%; 22% University degree + |
| Employment Status          | 54% employed                                        | 52% employed                                        | 68% employed                                        | 49% employed                                        | 56% employed                                        | 57% employed                                        |
| Financial Insecurity       | Difficulty pay bills 20%                            | Difficulty pay bills 43%                            | Difficulty pay bills 48%                            | Difficulty pay bills 25%                            | Difficulty pay bills 18%                            | Difficulty pay bills 16%                            |
| Exposure COVID-19          | .21 (.44)                                           | .16 (.42)                                           | .44 (.63)                                           | .37 (.57)                                           | .12 (.33)                                           | .45 (.70)                                           |
| Knowledge COVID-19         | 3.76 (.76)                                          | 4.02 (.80)                                          | 3.44 (.84)                                          | 3.87 (.79)                                          | 2.96 (.86)                                          | 3.54 (.82)                                          |
| Knowledge economic loss    | 3.37 (.87)                                          | 3.54 (.94)                                          | 3.33 (.88)                                          | 3.46 (.87)                                          | 2.74 (.87)                                          | 2.96 (.87)                                          |
| Quality Messages           | 4.20 (1.34)                                         | 4.72 (1.29)                                         | 4.64 (1.36)                                         | 4.27 (1.36)                                         | 3.17 (1.19)                                         | 4.32 (1.22)                                         |
| Community Norms            | 0.62 (1.62)                                         | 1.37 (1.31)                                         | 1.77 (1.29)                                         | 1.24 (1.38)                                         | 0.90 (1.33)                                         | 1.12 (1.40)                                         |
| Total Population           | 82.9                                                | 10.7                                                | 267.7                                               | 60.4                                                | 126.5                                               | 17.2                                                |
| GDP per capita             | 47603                                               | 20324                                               | 3894                                                | 34483                                               | 39290                                               | 53024                                               |
| Unemployment Rate          | 3.9                                                 | 22.3                                                | 7.5                                                 | 12.7                                                | 3.0                                                 | 6.5                                                 |
| Old Age Dependency Ratio   | 33                                                  | 34                                                  | 9                                                   | 36                                                  | 46                                                  | 30                                                  |
| Gini Index                 | 31.9                                                | 34.4                                                | 39                                                  | 35.9                                                | 32.9                                                | 28.5                                                |
| Life Expectancy            | 81                                                  | 81                                                  | 72                                                  | 83                                                  | 84                                                  | 82                                                  |
| Health Expenditure         | 11.25                                               | 8.04                                                | 2.99                                                | 8.84                                                | 10.94                                               | 10.1                                                |
| Private Health Expenditure | 15.49                                               | 39.64                                               | 51.1                                                | 26.1                                                | 15.91                                               | 18.45                                               |
| Out-of-pocket              | 12.67                                               | 34.75                                               | 34.61                                               | 23.49                                               | 12.85                                               | 11.09                                               |
| Hospital Beds              | 8.3                                                 | 4.3                                                 | 1.2                                                 | 3.4                                                 | 13.4                                                | 4.7                                                 |
| COVID-19 Cases             | 1399.08                                             | 212.64                                              | 22.85                                               | 2444.93                                             | 44.18                                               | 1842.11                                             |
| COVID-19 Deaths            | 30.20                                               | 10.23                                               | 1.99                                                | 312.05                                              | 0.71                                                | 209.01                                              |

**Table S2.** Sample Description (Cont.)

|                            | <b>PHILLIPINES</b>                                  | <b>ROMANIA</b>                                      | <b>RUSSIA</b>                                       | <b>SAUDI ARABIA</b>                                 | <b>SERBIA</b>                                       | <b>SOUTH AFRICA</b>                                 |
|----------------------------|-----------------------------------------------------|-----------------------------------------------------|-----------------------------------------------------|-----------------------------------------------------|-----------------------------------------------------|-----------------------------------------------------|
| Sample Size                | 1029                                                | 1040                                                | 1040                                                | 980                                                 | 1044                                                | 1151                                                |
| Age                        | 48%18-34<br>34% 35-54<br>17% 55+                    | 29%18-34<br>36% 35-54<br>35% 55+                    | 29%18-34<br>35% 35-54<br>36% 55+                    | 54%18-34<br>42% 35-54<br>5% 55+                     | 28%18-34<br>37% 35-54<br>35% 55+                    | 46%18-34<br>32% 35-54<br>23% 55+                    |
| Gender (% female)          | 50.1%                                               | 51.6%                                               | 54.5%                                               | 40.8%                                               | 51.5%                                               | 51.6%                                               |
| Education                  | Up to higher education 32%; 68% University degree + | Up to higher education 44%; 56% University degree + | Up to higher education 78%; 22% University degree + | Up to higher education 36%; 64% University degree + | Up to higher education 63%; 37% University degree + | Up to higher education 66%; 34% University degree + |
| Employment Status          | 53% employed                                        | 54% employed                                        | 55% employed                                        | 68% employed                                        | 54% employed                                        | 58% employed                                        |
| Financial Insecurity       | Difficulty pay bills 54%                            | Difficulty pay bills 29%                            | Difficulty pay bills 42%                            | Difficulty pay bills 41%                            | Difficulty pay bills 39%                            | Difficulty pay bills 50%                            |
| Exposure COVID-19          | .30 (.59)                                           | .17 (.40)                                           | .14 (.38)                                           | .32 (.62)                                           | .32 (.55)                                           | .13 (.35)                                           |
| Knowledge COVID-19         | 3.61 (.85)                                          | 3.77 (.80)                                          | 3.89 (.84)                                          | 3.91 (1.07)                                         | 3.96 (.79)                                          | 3.72 (.88)                                          |
| Knowledge economic loss    | 3.35 (.88)                                          | 3.44 (.90)                                          | 3.21 (.1.05)                                        | 3.43 (.1.15)                                        | 3.53 (.91)                                          | 3.44 (.95)                                          |
| Quality Messages           | 4.45 (1.29)                                         | 4.54 (1.40)                                         | 4.35 (1.49)                                         | 4.84 (1.45)                                         | 4.33 (1.53)                                         | 4.63 (1.35)                                         |
| Community Norms            | 1.83 (1.37)                                         | 1.14 (1.50)                                         | 0.56 (1.50)                                         | 1.60 (1.59)                                         | 1.41 (1.38)                                         | 1.67 (1.51)                                         |
| Total Population           | 106.6                                               | 19.5                                                | 144.5                                               | 33.7                                                | 6.9                                                 | 57.8                                                |
| GDP per capita             | 3103                                                | 12301                                               | 11289                                               | 23339                                               | 7247                                                | 6374                                                |
| Unemployment Rate          | 6.2                                                 | 10.1                                                | 4.9                                                 | 6.0                                                 | 13.4                                                | 35.3                                                |
| Old Age Dependency Ratio   | 8                                                   | 28                                                  | 22                                                  | 5                                                   | 28                                                  | 8                                                   |
| Gini Index                 | 44.4                                                | 36                                                  | 37.5                                                | 45.9                                                | 36.2                                                | 63                                                  |
| Life Expectancy            | 71                                                  | 75                                                  | 73                                                  | 75                                                  | 76                                                  | 64                                                  |
| Health Expenditure         | 4.45                                                | 5.16                                                | 5.34                                                | 5.23                                                | 8.11                                                | 8.11                                                |
| Private Health Expenditure | 65.5                                                | 21.41                                               | 42.91                                               | 35.91                                               | 43.13                                               | 44.39                                               |
| Out-of-pocket              | 53.05                                               | 20.49                                               | 40.49                                               | 16.86                                               | 41.75                                               | 7.77                                                |
| Hospital Beds              | 1.00                                                | 6.30                                                | 8.20                                                | 2.70                                                | 5.70                                                | 2.80                                                |
| COVID-19 Cases             | 55.44                                               | 437.18                                              | 255.03                                              | 237.24                                              | 881.85                                              | 33.53                                               |
| COVID-19 Deaths            | 3.63                                                | 21.68                                               | 2.16                                                | 2.64                                                | 16.17                                               | 0.38                                                |

**Table S2.** Sample Description (Cont.)

|                            | <b>SOUTH KOREA</b>                                  | <b>SPAIN</b>                                        | <b>TURKEY</b>                                       | <b>UK</b>                                           | <b>UKRAINE</b>                                      | <b>USA</b>                                          |
|----------------------------|-----------------------------------------------------|-----------------------------------------------------|-----------------------------------------------------|-----------------------------------------------------|-----------------------------------------------------|-----------------------------------------------------|
| Sample Size                | 1021                                                | 1048                                                | 1068                                                | 1096                                                | 979                                                 | 1055                                                |
| Age                        | 35%18-34<br>41% 35-54<br>24% 55+                    | 22%18-34<br>39% 35-54<br>39% 55+                    | 42%18-34<br>37% 35-54<br>22% 55+                    | 29%18-34<br>35% 35-54<br>36% 55+                    | 31%18-34<br>37% 35-54<br>32% 55+                    | 30%18-34<br>37% 35-54<br>33% 55+                    |
| Gender (% female)          | 51.2%                                               | 51.1%                                               | 51.7%                                               | 52.1%                                               | 51.2%                                               | 52.9%                                               |
| Education                  | Up to higher education 32%; 68% University degree + | Up to higher education 62%; 38% University degree + | Up to higher education 37%; 63% University degree + | Up to higher education 68%; 32% University degree + | Up to higher education 71%; 29% University degree + | Up to higher education 61%; 39% University degree + |
| Employment Status          | 65% employed                                        | 56% employed                                        | 58% employed                                        | 53% employed                                        | 56% employed                                        | 50% employed                                        |
| Financial Insecurity       | Difficulty pay bills 36%                            | Difficulty pay bills 32%                            | Difficulty pay bills 42%                            | Difficulty pay bills 22%                            | Difficulty pay bills 50%                            | Difficulty pay bills 36%                            |
| Exposure COVID-19          | .23 (.47)                                           | .61 (.73)                                           | .52 (.68)                                           | .34 (.58)                                           | .13 (.34)                                           | .28 (.52)                                           |
| Knowledge COVID-19         | 3.76 (.85)                                          | 3.61 (.91)                                          | 4.05 (.86)                                          | 3.38 (.87)                                          | 3.81 (.84)                                          | 3.59 (.92)                                          |
| Knowledge economic loss    | 3.47 (.83)                                          | 3.41 (1.08)                                         | 3.68 (1.00)                                         | 2.92 (.94)                                          | 3.14 (1.01)                                         | 3.35 (1.00)                                         |
| Quality Messages           | 4.37 (1.24)                                         | 4.27 (1.40)                                         | 4.41 (1.40)                                         | 4.33 (1.38)                                         | 4.18 (1.47)                                         | 4.19 (1.45)                                         |
| Community Norms            | 1.69 (1.33)                                         | 1.72 (1.56)                                         | 1.00 (1/67)                                         | 1.42 (1.48)                                         | 0.71 (1.53)                                         | 1.45 (1.50)                                         |
| Total Population           | 51.6                                                | 46.8                                                | 82.3                                                | 66.5                                                | 44.6                                                | 326.7                                               |
| GDP per capita             | 31363                                               | 30371                                               | 9370                                                | 42944                                               | 3095                                                | 62795                                               |
| Unemployment Rate          | 4.5                                                 | 20.8                                                | 17.2                                                | 10.1                                                | 4.8                                                 | 10.4                                                |
| Old Age Dependency Ratio   | 20                                                  | 29                                                  | 13                                                  | 29                                                  | 24                                                  | 24                                                  |
| Gini Index                 | 31.6                                                | 34.7                                                | 41.9                                                | 34.8                                                | 26.1                                                | 41.4                                                |
| Life Expectancy            | 83                                                  | 83                                                  | 77                                                  | 81                                                  | 72                                                  | 79                                                  |
| Health Expenditure         | 7.6                                                 | 8.87                                                | 4.22                                                | 9.63                                                | 7                                                   | 17.06                                               |
| Private Health Expenditure | 41.13                                               | 29.38                                               | 22.29                                               | 20.58                                               | 54.3                                                | 15.47                                               |
| Out-of-pocket              | 33.67                                               | 23.57                                               | 17.38                                               | 15.96                                               | 52.32                                               | 10.99                                               |
| Hospital Beds              | 11.50                                               | 3.00                                                | 2.70                                                | 2.80                                                | 8.80                                                | 2.90                                                |
| COVID-19 Cases             | 207.97                                              | 3589.04                                             | 559.16                                              | 1052.45                                             | 123.97                                              | 1508.09                                             |
| COVID-19 Deaths            | 4.56                                                | 338.18                                              | 11.92                                               | 156.96                                              | 3.24                                                | 56.47                                               |



**Table S3.** Summary statistics for risk perceptions [Means (SD), correlation, paired samples t-test]

|              | <b>Perceived<br/>Health Risk</b> | <b>Perceived<br/>Economic Risk</b> | <i>r</i> | <b>Paired samples t-test</b> |           |                |
|--------------|----------------------------------|------------------------------------|----------|------------------------------|-----------|----------------|
|              |                                  |                                    |          | <i>t</i>                     | <i>df</i> | <i>p-value</i> |
| Argentina    | 3.41 (1.38)                      | 4.68 (1.83)                        | .301     | -22.42                       | 1169      | .000           |
| Australia    | 3.29 (1.34)                      | 4.29 (1.81)                        | .283     | -16.06                       | 1028      | .000           |
| Brazil       | 3.19 (1.48)                      | 4.44 (1.81)                        | .323     | -21.31                       | 1092      | .000           |
| Canada       | 3.40 (1.27)                      | 4.38 (1.78)                        | .302     | -17.09                       | 1050      | .000           |
| China        | 2.41 (1.27)                      | 4.28 (1.85)                        | .345     | -34.81                       | 1173      | .000           |
| France       | 3.73 (1.41)                      | 4.04 (1.70)                        | .329     | -5.58                        | 1082      | .000           |
| Germany      | 3.29 (1.31)                      | 3.51 (1.76)                        | .270     | -3.79                        | 1077      | .000           |
| Greece       | 3.66 (1.36)                      | 5.03 (1.68)                        | .209     | -22.25                       | 983       | .000           |
| Indonesia    | 3.04 (1.47)                      | 4.71 (1.86)                        | .362     | -26.92                       | 940       | .000           |
| Italy        | 3.25 (1.23)                      | 4.32 (1.66)                        | .249     | -19.83                       | 1112      | .000           |
| Japan        | 3.99 (1.14)                      | 4.63 (1.54)                        | .419     | -14.10                       | 1085      | .000           |
| Netherlands  | 3.54 (1.31)                      | 3.67 (1.56)                        | .323     | -2.51                        | 1038      | .000           |
| Philippines  | 2.36 (1.29)                      | 4.14 (1.92)                        | .393     | -30.78                       | 1024      | .000           |
| Romania      | 2.94 (1.49)                      | 4.20 (1.78)                        | .397     | -22.25                       | 1035      | .000           |
| Russia       | 2.87 (1.19)                      | 4.36 (1.76)                        | .298     | -26.61                       | 1033      | .000           |
| Saudi Arabia | 2.97 (1.53)                      | 3.88 (1.87)                        | .329     | -14.35                       | 974       | .000           |
| Serbia       | 2.66 (1.22)                      | 4.07 (1.75)                        | .276     | -24.73                       | 1035      | .000           |
| South Africa | 3.09 (1.39)                      | 5.04 (1.89)                        | .265     | -32.67                       | 1145      | .000           |
| South Korea  | 2.90 (1.49)                      | 4.41 (1.77)                        | .347     | -25.74                       | 1018      | .000           |
| Spain        | 3.73 (1.44)                      | 4.63 (1.68)                        | .265     | -15.17                       | 1046      | .000           |
| Turkey       | 3.57 (1.43)                      | 4.72 (1.69)                        | .311     | -20.24                       | 1061      | .000           |
| UK           | 3.85 (1.40)                      | 4.11 (1.79)                        | .306     | -4.55                        | 1094      | .000           |
| Ukraine      | 2.89 (1.25)                      | 4.54 (1.68)                        | .334     | -29.88                       | 972       | .000           |
| USA          | 3.35 (1.56)                      | 4.31 (1.90)                        | .411     | -16.44                       | 1051      | .000           |

Figure S1. Standardized health perceived risk per country

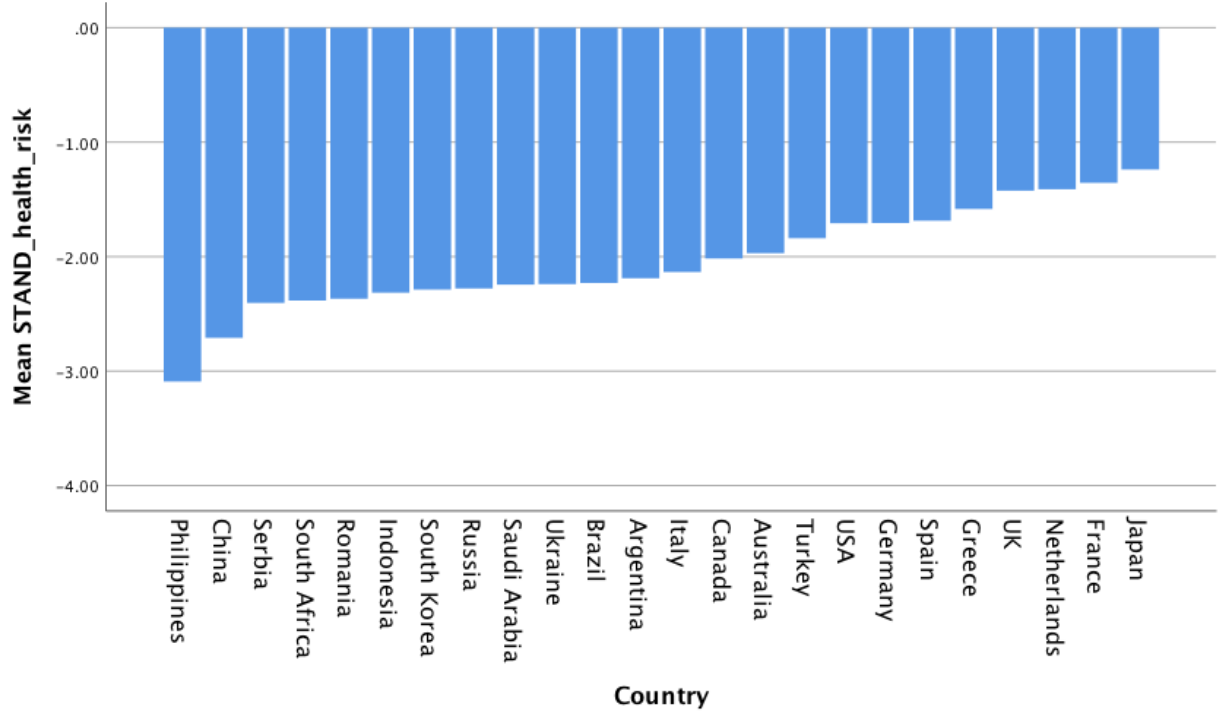

Figure S2. Standardized economic perceived risk per country

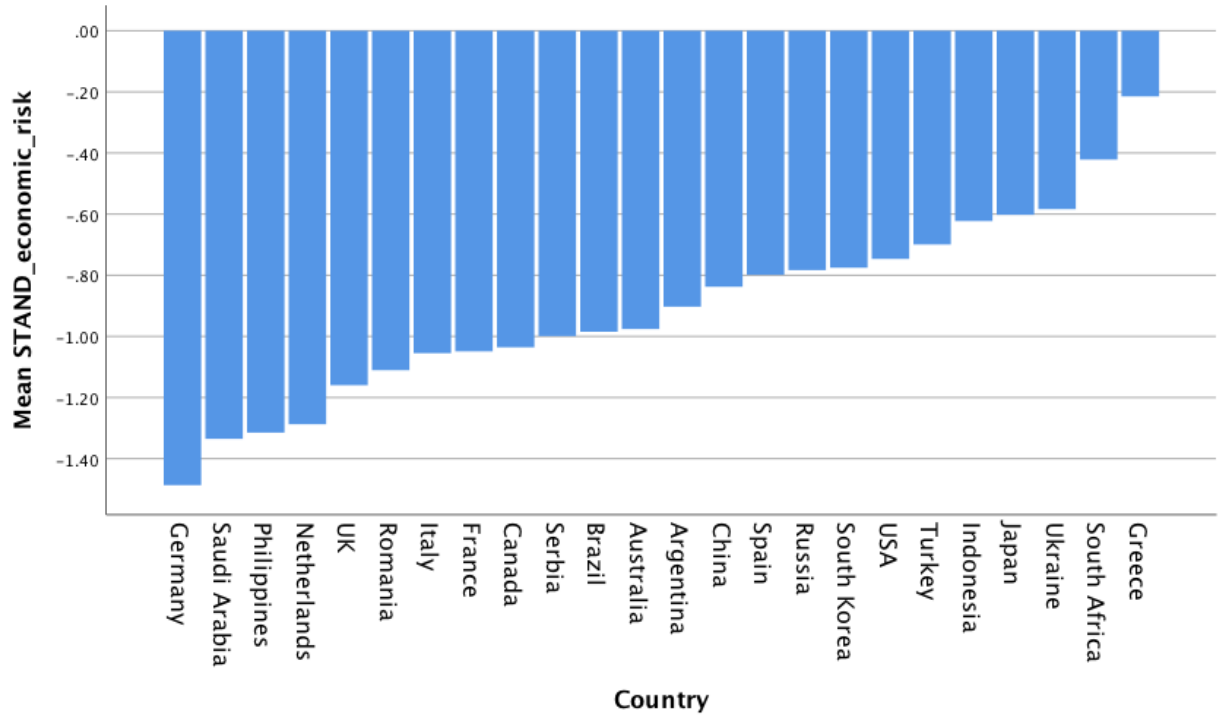

Figure S3. Perceived health and economic risk per sociodemographic groups (unadjusted means)

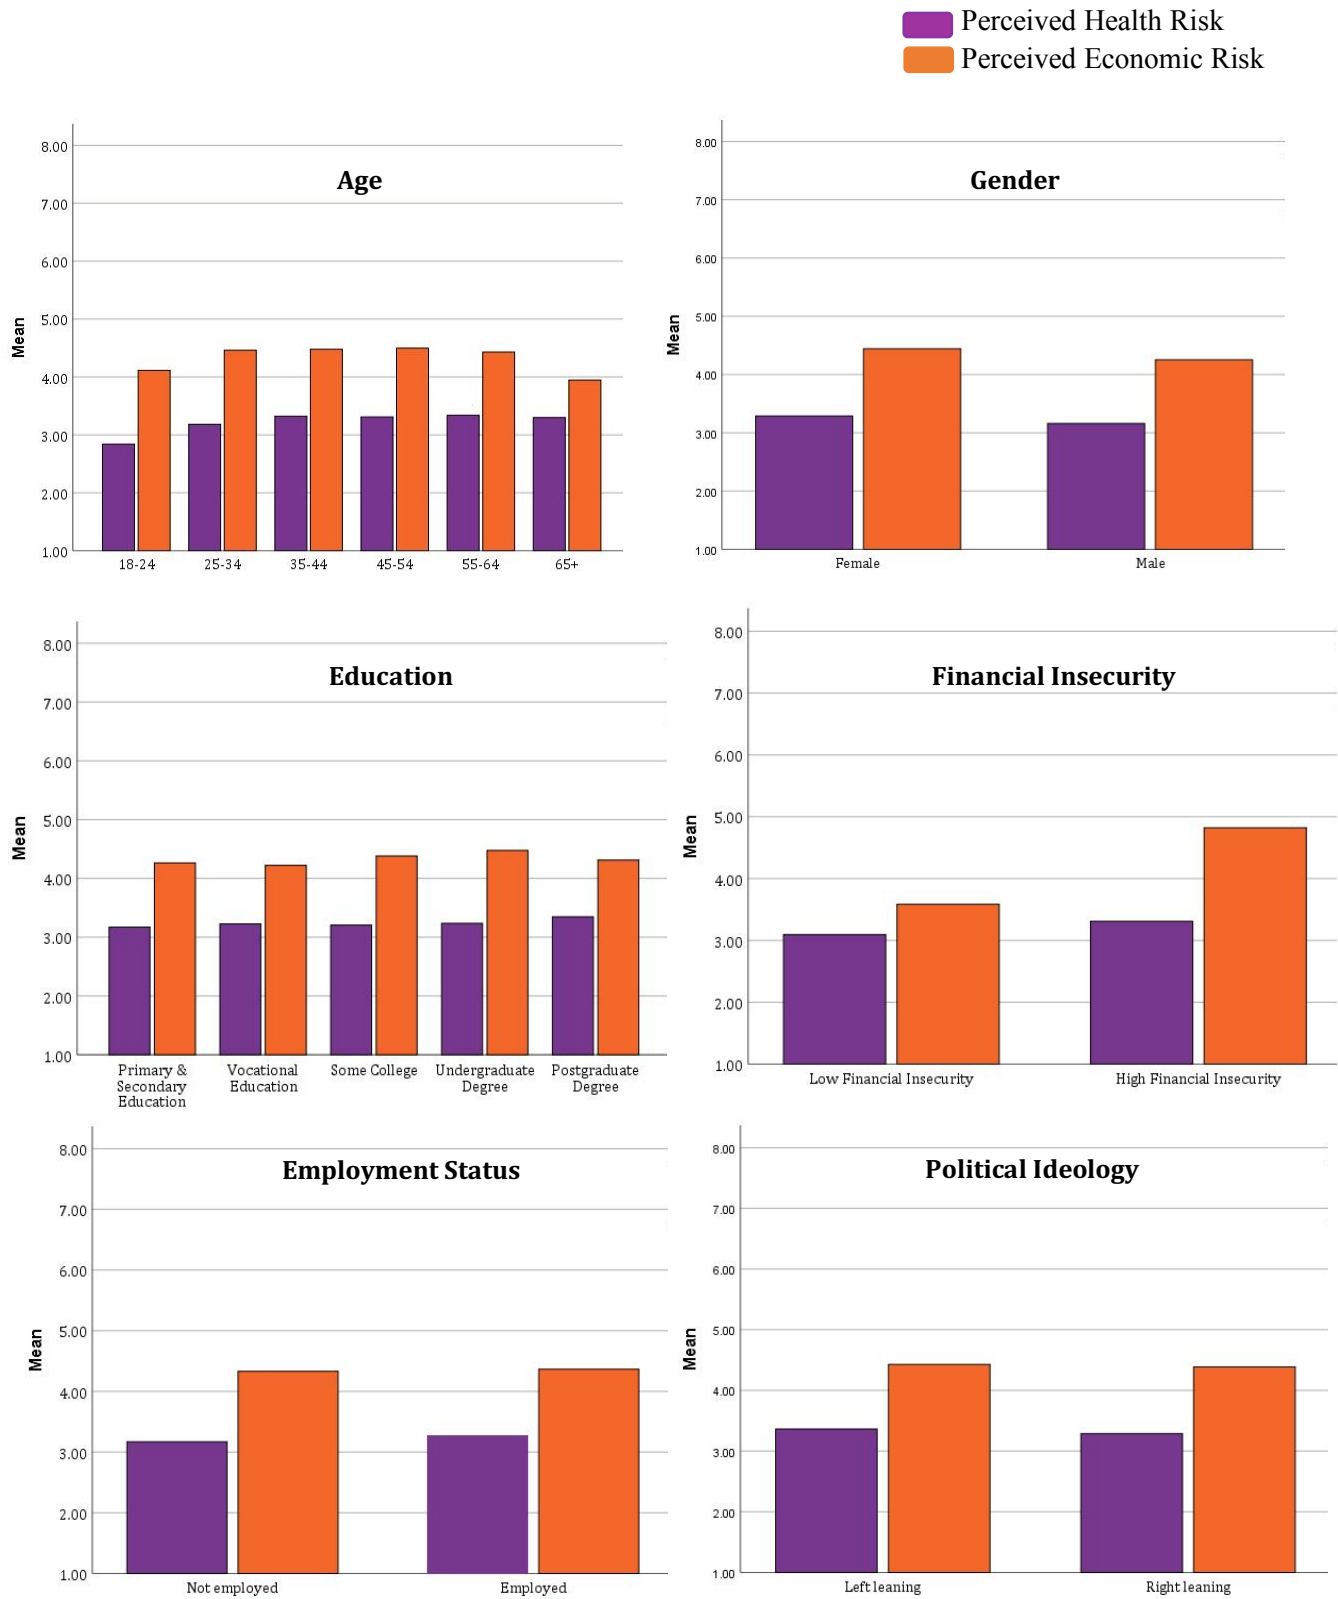

Per age groups, individuals aged 18-24 reported the lowest health risk perception (M=2.84 SD=1.50 95% CI 2.79-2.89), and lower than the group 25-34 (M=3.18 SD=1.52 95% CI 3.14-3.23; Tukey HSD *post-hoc* test  $p < .001$ ). Individuals in older groups (35-65+) report a similar health risk perception (M=3.30 to M=3.34; all Tukey HSD *post-hoc* test  $p > .05$ ), and higher than both younger groups. Regarding perceived economic risk, the oldest group 65+ has the lowest risk perception (M=2.95 SD=1.66 95% CI 3.89-4.00), and lower than the youngest 18-24 group (M=4.11 SD=1.92 95% CI 4.05-4.18; Tukey HSD *post-hoc* test  $p < .001$ ). All ages groups representing the working force (25-64 years old) share a similar economic risk perception (M=4.43 to M=4.50; all Tukey HSD *post-hoc* test  $p > .05$ ).

Gender comparisons show that women have a higher risk perception concerning both their health (M=3.29 SD=1.42 95% CI 3.27-3.32 vs. men health risk M=3.16 SD=1.43 95% CI 3.13-3.18  $p < .001$ ) and their economic situation (M=4.44 SD=1.79 95% CI 4.41-4.47 vs. men M=4.25 SD=1.81 95% CI 4.22-4.28,  $p < .001$ ).

With respect to education attainment, the most educated group at the postgraduate level reports the highest health risk perception (M=3.35 SD=1.43 95% CI 3.21-3.25), compared to all other educational groups (Tukey HSD *post-hoc* tests  $p < .001$ ). Among all these groups, the lowest economic risk perception is reported by the less educated individuals, both with primary and secondary education (M=4.26 SD=1.86 95% CI 4.21-4.32) and vocational education (M=4.22 SD=1.83 95% CI 4.16-4.28,  $p = .825$ ).

Concerning employment status, employed (vs. unemployed) people perceive a higher risk to contract the virus (M=3.27 SD=1.46 95% CI 3.25-3.29; unemployed M=3.17 SD=1.38 95% CI 3.14-3.20,  $p < .001$ ). Interestingly, there are no significant differences between employed and unemployed people about perceived economic risk: all share a similar concern (M=3.33 and M=3.37  $p = .120$ ).

More than individuals' employment status, it seems to be their financial situation that carries a greater weight in risk perceptions. Individuals experiencing financial difficulties not only have a higher perceived health risk (M=3.31 SD=1.45 95% CI 3.29-3.33 vs. low financial difficulties M=3.09 SD=1.39 95% CI 3.07-3.12  $p < .001$ ) but a much higher risk economic perception (M=4.82 SD=1.75 95% CI 4.79-4.85 vs. low financial difficulties M=3.58 SD=1.62 95% CI 3.55-3.62  $p < .001$ ).

Lastly, participants that position themselves on the left (vs. right) side of the political spectrum have a higher perceived health risk (M=3.36 SD=1.38 95% CI 3.33-3.39; right side M=3.29 SD=1.42 95% CI 3.26-3.32,  $p = .001$ ) but different political ideologies share the same level of perceived economic risk (M=4.43 and M=4.39  $p = .138$ ).

**Table S4.** Summary statistics for primary and secondary outcomes [Means (SD)]

|              | <b>Frequent<br/>Hand Wash</b> | <b>Avoid<br/>Crowds</b> | <b>Social<br/>Isolation</b> | <b>Mandatory<br/>Vaccination</b> | <b>Mandatory<br/>Quarantine</b> | <b>Report<br/>Suspect Cases</b> |
|--------------|-------------------------------|-------------------------|-----------------------------|----------------------------------|---------------------------------|---------------------------------|
| Argentina    | 2.23 (1.39)                   | 2.39 (1.24)             | 5.95 (1.88)                 | 1.75 (1.75)                      | 2.19 (1.37)                     | 1.74 (1.57)                     |
| Australia    | 1.99 (1.26)                   | 2.19 (1.12)             | 5.05 (2.39)                 | 1.28 (1.69)                      | 1.94 (1.41)                     | 1.39 (1.52)                     |
| Brazil       | 2.33 (1.15)                   | 2.42 (1.05)             | 4.73 (2.39)                 | 1.95 (1.47)                      | 2.15 (1.28)                     | 1.44 (1.60)                     |
| Canada       | 2.21 (1.19)                   | 2.36 (1.09)             | 5.61 (2.17)                 | 1.40 (1.77)                      | 2.10 (1.39)                     | 1.44 (1.54)                     |
| China        | 2.49 (.83)                    | 2.43 (.85)              | 3.16 (2.27)                 | 1.08 (1.49)                      | 2.13 (1.10)                     | 2.10 (1.02)                     |
| France       | 2.08 (1.31)                   | 2.26 (1.22)             | 5.36 (2.30)                 | 0.97 (1.84)                      | 1.54 (1.51)                     | 0.32 (1.85)                     |
| Germany      | 1.91 (1.47)                   | 2.15 (1.32)             | 5.33 (2.22)                 | 1.16 (1.88)                      | 1.51 (1.61)                     | 0.55 (1.82)                     |
| Greece       | 2.24 (1.16)                   | 2.33 (1.09)             | 4.90 (2.26)                 | 0.31 (2.10)                      | 1.96 (1.42)                     | 0.96 (1.75)                     |
| Indonesia    | 2.38 (1.05)                   | 2.34 (1.05)             | 3.39 (2.48)                 | 1.83 (1.31)                      | 2.16 (1.17)                     | 2.01 (1.16)                     |
| Italy        | 2.09 (1.23)                   | 2.42 (1.05)             | 5.51 (2.22)                 | 1.51 (1.73)                      | 2.11 (1.31)                     | 1.43 (1.59)                     |
| Japan        | 1.89 (1.22)                   | 1.99 (1.21)             | 5.27 (2.25)                 | 1.19 (1.39)                      | 1.26 (1.34)                     | 1.06 (1.38)                     |
| Netherlands  | 1.74 (1.42)                   | 1.98 (1.24)             | 4.87 (2.29)                 | 1.08 (1.82)                      | 1.56 (1.46)                     | 0.64 (1.74)                     |
| Philippines  | 2.55 (0.95)                   | 2.61 (0.86)             | 4.69 (2.45)                 | 2.00 (1.41)                      | 2.42 (1.08)                     | 2.22 (1.14)                     |
| Romania      | 2.38 (1.08)                   | 2.42 (0.99)             | 5.31 (2.14)                 | 0.91 (2.05)                      | 2.07 (1.38)                     | 1.66 (1.55)                     |
| Russia       | 2.16 (1.19)                   | 2.07 (1.21)             | 4.84 (2.42)                 | 0.88 (1.82)                      | 2.08 (1.26)                     | 1.35 (1.59)                     |
| Saudi Arabia | 2.05 (1.55)                   | 2.22 (1.37)             | 4.36 (2.59)                 | 1.67 (1.68)                      | 1.94 (1.54)                     | 1.92 (1.44)                     |
| Serbia       | 2.26 (1.11)                   | 2.24 (1.21)             | 5.09 (2.10)                 | 0.31 (2.09)                      | 1.93 (1.34)                     | 1.32 (1.70)                     |
| South Africa | 2.34 (1.10)                   | 2.50 (0.95)             | 5.26 (2.23)                 | 1.00 (1.97)                      | 2.11 (1.22)                     | 1.76 (1.43)                     |
| South Korea  | 1.92 (1.26)                   | 1.77 (1.26)             | 4.74 (2.03)                 | 1.48 (1.35)                      | 1.78 (1.30)                     | 1.63 (1.30)                     |
| Spain        | 2.14 (1.41)                   | 2.40 (1.22)             | 5.91 (1.97)                 | 1.67 (1.62)                      | 1.83 (1.42)                     | 0.86 (1.77)                     |
| Turkey       | 2.18 (1.36)                   | 2.28 (1.32)             | 4.84 (2.44)                 | 1.41 (1.61)                      | 1.85 (1.48)                     | 1.84 (1.48)                     |
| UK           | 2.01 (1.36)                   | 2.21 (1.31)             | 5.54 (2.23)                 | 1.30 (1.74)                      | 1.63 (1.54)                     | 1.05 (1.68)                     |
| Ukraine      | 2.26 (1.12)                   | 2.12 (1.15)             | 4.42 (2.38)                 | 0.74 (1.92)                      | 2.07 (1.21)                     | 1.16 (1.61)                     |
| USA          | 2.05 (1.42)                   | 2.17 (1.33)             | 4.80 (2.50)                 | 0.84 (1.99)                      | 1.54 (1.64)                     | 0.76 (1.84)                     |
| Total M(SD)  | 2.17 (1.26)                   | 2.27 (1.17)             | 4.97 (2.37)                 | 1.25 (1.81)                      | 1.92 (1.40)                     | 1.37 (1.65)                     |

**Table S5.** Summary statistics for primary and secondary outcomes (% agree and strongly agree)

|              | Preventive Health Behaviors |              |                  | Support for Strict Health Policies |                      |                      |
|--------------|-----------------------------|--------------|------------------|------------------------------------|----------------------|----------------------|
|              | Frequent Hand Wash          | Avoid Crowds | Social Isolation | Mandatory Vaccination              | Mandatory Quarantine | Report Suspect Cases |
| Argentina    | 85%                         | 87%          | 77%              | 73%                                | 84%                  | 71%                  |
| Australia    | 75%                         | 80%          | 60%              | 54%                                | 72%                  | 55%                  |
| Brazil       | 87%                         | 88%          | 51%              | 76%                                | 81%                  | 58%                  |
| Canada       | 81%                         | 85%          | 72%              | 59%                                | 77%                  | 56%                  |
| China        | 91%                         | 90%          | 17%              | 47%                                | 77%                  | 78%                  |
| France       | 74%                         | 81%          | 65%              | 44%                                | 56%                  | 29%                  |
| Germany      | 74%                         | 81%          | 62%              | 54%                                | 62%                  | 35%                  |
| Greece       | 84%                         | 87%          | 53%              | 37%                                | 75%                  | 47%                  |
| Indonesia    | 88%                         | 87%          | 27%              | 73%                                | 82%                  | 79%                  |
| Italy        | 79%                         | 87%          | 69%              | 64%                                | 80%                  | 59%                  |
| Japan        | 71%                         | 75%          | 61%              | 45%                                | 46%                  | 40%                  |
| Netherlands  | 71%                         | 75%          | 53%              | 54%                                | 64%                  | 38%                  |
| Philippines  | 91%                         | 93%          | 49%              | 76%                                | 88%                  | 83%                  |
| Romania      | 86%                         | 88%          | 63%              | 49%                                | 77%                  | 64%                  |
| Russia       | 80%                         | 76%          | 53%              | 44%                                | 77%                  | 55%                  |
| Saudi Arabia | 79%                         | 82%          | 45%              | 68%                                | 75%                  | 74%                  |
| Serbia       | 86%                         | 85%          | 55%              | 37%                                | 77%                  | 58%                  |
| South Africa | 85%                         | 90%          | 61%              | 53%                                | 80%                  | 69%                  |
| South Korea  | 72%                         | 67%          | 44%              | 55%                                | 66%                  | 61%                  |
| Spain        | 79%                         | 85%          | 76%              | 66%                                | 71%                  | 44%                  |
| Turkey       | 82%                         | 84%          | 54%              | 60%                                | 75%                  | 75%                  |
| UK           | 75%                         | 80%          | 69%              | 55%                                | 64%                  | 46%                  |
| Ukraine      | 84%                         | 80%          | 41%              | 43%                                | 78%                  | 50%                  |
| USA          | 78%                         | 80%          | 54%              | 46%                                | 62%                  | 40%                  |
| Total Mean   | 81%                         | 83%          | 55%              | 56%                                | 73%                  | 57%                  |

*Note:* Percentage of answers “agree” or “strongly agree” except social isolation, which presents answers for 6 or 7 days of social isolation in the past week.

**Figure S4.** Association between health and economic risk, and each of the six outcomes (raw scores)

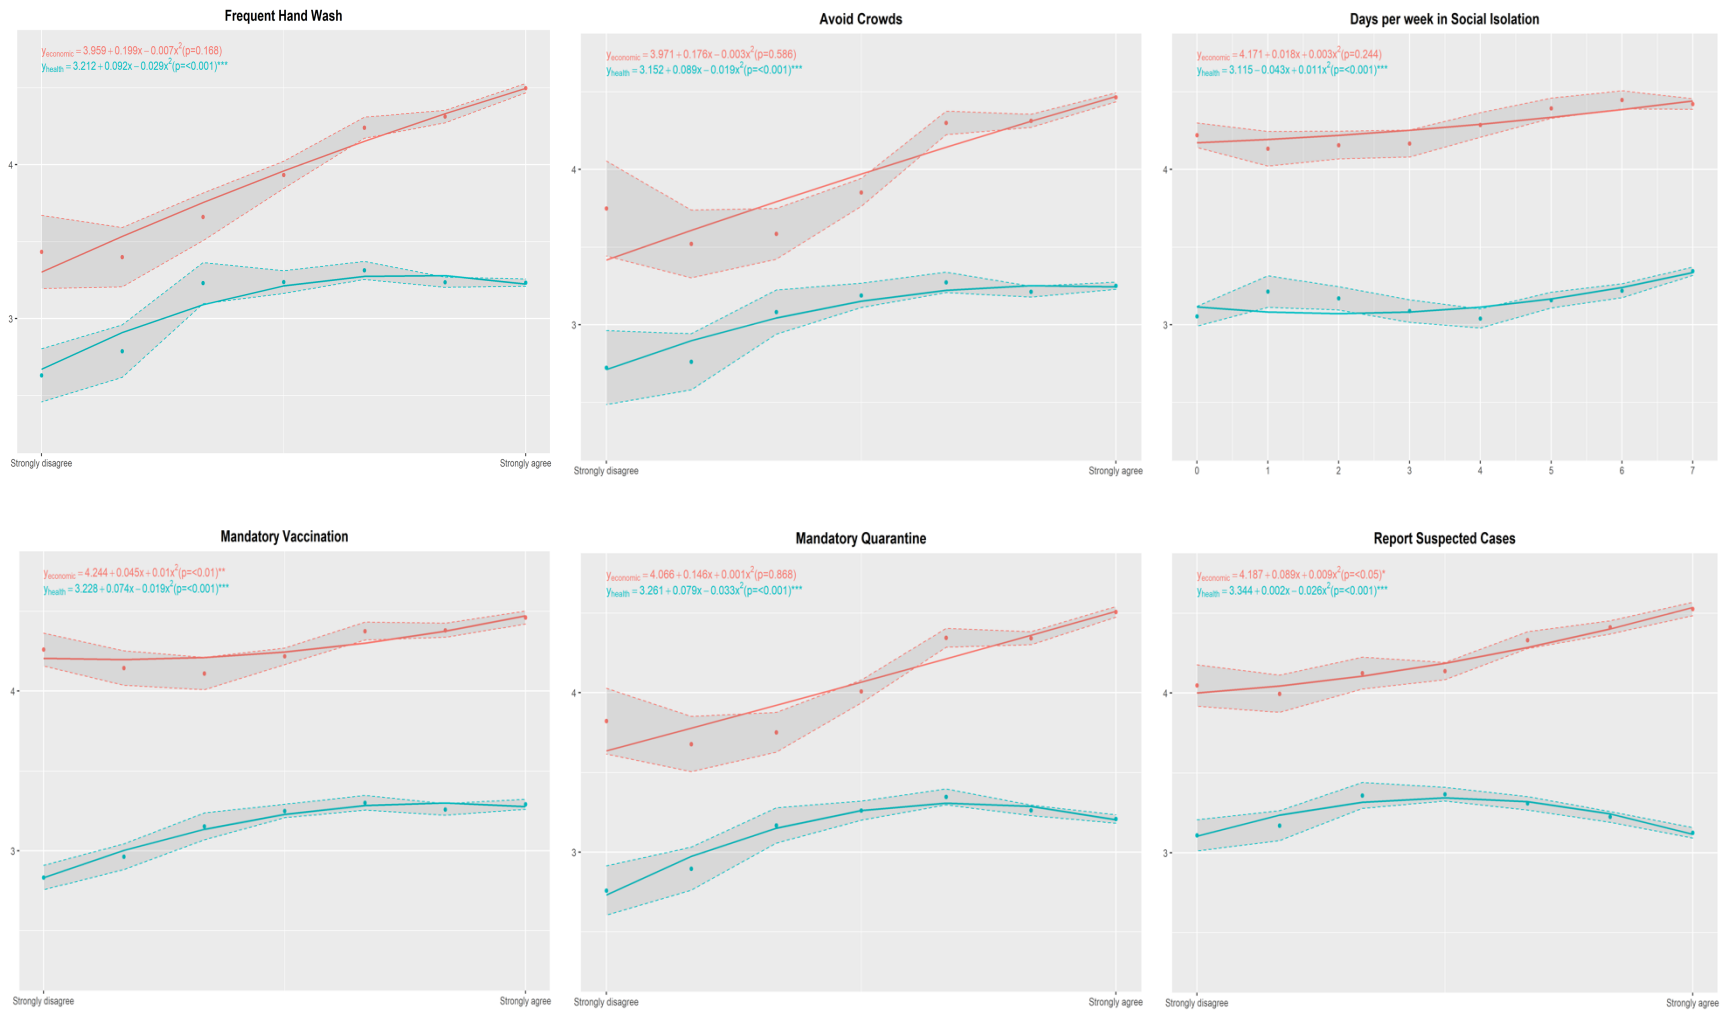

All these exploratory analyses plotting health and economic risk independently show both risks significantly predict all outcomes. However, multilevel regressions models (Table 1-2; Supplementary Table 6 and 7 below) show that health risk is no longer significant in several instances, when economic risk is taken into account. This suggests that part of the association between health risk and mitigation measures derives from fears of not being able to work/ income loss due to contracting the virus.

**Table S6. Multilevel Regression Modeling: Preventive Health Behaviors**

|                                             | Frequent Hand Wash |              |               | Avoid Crowds |              |               | Social Isolation |               |               |
|---------------------------------------------|--------------------|--------------|---------------|--------------|--------------|---------------|------------------|---------------|---------------|
|                                             | 0                  | 1            | 2             | 0            | 1            | 2             | 0                | 1             | 2             |
| Intercept                                   | .02 (.06)          | .02 (.05)    | .00 (.03)     | -.01 (.06)   | .00 (.06)    | .01 (.03)     | -.04 (.08)       | -.08 (.23)    | -.04 (.06)    |
| Control: Case-Fatality Rate                 | -.02 (.04)         | -.02 (.04)   | .00 (.02)     | .01 (.04)    | .00 (.04)    | -.01 (.02)    | .04 (.06)        | .11 (.06)     | .06 (.04)     |
| Main IVs                                    |                    |              |               |              |              |               |                  |               |               |
| Health Risk (HR)                            |                    | .01 (.02)    | .03 (.02)     |              | .00 (.02)    | .02 (.01)     |                  | .01 (.01)     | .01 (.01)     |
| Economic Risk (ER)                          |                    | .11*** (.01) | .11*** (.01)  |              | .09*** (.01) | .10*** (.01)  |                  | .05*** (.01)  | .06*** (.01)  |
| HR X ER                                     |                    | .01 (.01)    | .02** (.01)   |              | .00 (.01)    | .01 (.01)     |                  | -.02** (.01)  | -.01 (.01)    |
| Health Risk <sup>2</sup> (HR <sup>2</sup> ) |                    | -.01 (.01)   | -.01 (.00)    |              | .00 (.01)    | .01 (.00)     |                  | -.03*** (.01) | -.02** (.01)  |
| HR <sup>2</sup> X ER                        |                    | .00 (.00)    | -.01 (.00)    |              | .01 (.00)    | .00 (.00)     |                  | .00 (.00)     | .01 (.00)     |
| Individual-level covariates                 |                    |              |               |              |              |               |                  |               |               |
| Exposure Covid19                            |                    |              | -.09*** (.01) |              |              | -.08*** (.01) |                  |               | -.09*** (.01) |
| Knowledge Virus                             |                    |              | .18*** (.01)  |              |              | .18*** (.01)  |                  |               | .04*** (.01)  |
| Knowledge Economy                           |                    |              | -.01* (.01)   |              |              | -.03*** (.01) |                  |               | -.04** (.01)  |
| Quality Messages                            |                    |              | .13*** (.01)  |              |              | .13*** (.01)  |                  |               | .01 (.01)     |
| Community Norms                             |                    |              | .21*** (.01)  |              |              | .22*** (.01)  |                  |               | .05*** (.01)  |
| Age                                         |                    |              | .08*** (.01)  |              |              | .07*** (.01)  |                  |               | .12*** (.01)  |
| Gender                                      |                    |              | -.07*** (.01) |              |              | -.07*** (.00) |                  |               | -.08*** (.01) |
| Education                                   |                    |              | .00 (.01)     |              |              | .01** (.01)   |                  |               | .02*** (.01)  |
| Employment                                  |                    |              | -.01 (.01)    |              |              | -.05*** (.01) |                  |               | -.05*** (.01) |
| Financial status                            |                    |              | .00 (.01)     |              |              | -.02*** (.01) |                  |               | -.03*** (.05) |
| Country-level covariates                    |                    |              |               |              |              |               |                  |               |               |
| Total Population                            |                    |              | .05* (.02)    |              |              | .05 (.02)     |                  |               | -.18*** (.04) |
| GDP per capita                              |                    |              | -.18*** (.04) |              |              | -.09 (.05)    |                  |               | -.09 (.09)    |
| Unemployment Rate                           |                    |              | -.05 (.03)    |              |              | -.04 (.03)    |                  |               | -.03 (.05)    |
| Gini Index                                  |                    |              | -.03 (.04)    |              |              | .01 (.05)     |                  |               | .12 (.08)     |
| Old Age Dependency Ratio                    |                    |              | .14** (.04)   |              |              | .15** (.05)   |                  |               | -.01 (.08)    |
| Life Expectancy                             |                    |              | -.07* (.03)   |              |              | -.08 (.04)    |                  |               | .06 (.07)     |
| Health Expenditure                          |                    |              | .07* (.03)    |              |              | .02 (.04)     |                  |               | .08 (.06)     |
| Private Health Expenditure                  |                    |              | .08 (.06)     |              |              | .04 (.07)     |                  |               | -.17 (.12)    |
| Out-of-pocket payment                       |                    |              | -.08 (.06)    |              |              | -.05 (.08)    |                  |               | .08 (.12)     |
| Hospital Beds                               |                    |              | -.09** (.02)  |              |              | -.14*** (.03) |                  |               | -.02 (.05)    |



**Table S7. Multilevel Regression Modeling: Support for Strict Containment Measures**

|                                             | Mandatory Vaccination |              |               | Mandatory Quarantine |              |               | Report Suspected Cases |              |               |
|---------------------------------------------|-----------------------|--------------|---------------|----------------------|--------------|---------------|------------------------|--------------|---------------|
|                                             | 0                     | 1            | 2             | 0                    | 1            | 2             | 0                      | 1            | 2             |
| Intercept                                   | -.09 (.08)            | -.05 (.07)   | -.04 (.06)    | .00 (.07)            | .01 (.07)    | -.03 (.05)    | -.02 (.10)             | -.02 (.09)   | -.06 (.07)    |
| Control: Case-Fatality Rate                 | .09 (.06)             | .04 (.04)    | .04 (.04)     | .00 (.05)            | -.01 (.05)   | .03 (.04)     | .02 (.07)              | -.01 (.05)   | .03 (.05)     |
| Main IVs                                    |                       |              |               |                      |              |               |                        |              |               |
| Health Risk (HR)                            |                       | .05*** (.01) | .06*** (.01)  |                      | .01 (.01)    | .03* (.01)    |                        | -.02 (.01)   | .00 (.01)     |
| Economic Risk (ER)                          |                       | .03* (.02)   | .04** (.14)   |                      | .09*** (.01) | .10*** (.01)  |                        | .07*** (.01) | .05*** (.01)  |
| HR X ER                                     |                       | .01 (.01)    | .01* (.01)    |                      | .00 (.01)    | .00 (.01)     |                        | .01 (.01)    | .01 (.01)     |
| Health Risk <sup>2</sup> (HR <sup>2</sup> ) |                       | .00 (.01)    | .00 (.01)     |                      | .00 (.01)    | .01 (.01)     |                        | .03*** (.01) | .02*** (.01)  |
| HR <sup>2</sup> X ER                        |                       | .00 (.00)    | .00 (.00)     |                      | .00 (.01)    | .00 (.00)     |                        | .00 (.00)    | .00 (.00)     |
| Individual-level covariates                 |                       |              |               |                      |              |               |                        |              |               |
| Exposure Covid19                            |                       |              | -.01 (.01)    |                      |              | -.05*** (.01) |                        |              | -.02* (.01)   |
| Knowledge Virus                             |                       |              | .08*** (.01)  |                      |              | .16*** (.01)  |                        |              | .10*** (.01)  |
| Knowledge Economy                           |                       |              | .02** (.01)   |                      |              | -.03*** (.01) |                        |              | .01 (.01)     |
| Quality Messages                            |                       |              | .13*** (.01)  |                      |              | .14*** (.01)  |                        |              | .14*** (.01)  |
| Community Norms                             |                       |              | .15*** (.01)  |                      |              | .20*** (.01)  |                        |              | .16*** (.01)  |
| Age                                         |                       |              | .05*** (.01)  |                      |              | .06*** (.01)  |                        |              | -.01 (.01)    |
| Gender                                      |                       |              | .03*** (.01)  |                      |              | -.05*** (.00) |                        |              | -.02*** (.01) |
| Education                                   |                       |              | .00 (.01)     |                      |              | -.01 (.01)    |                        |              | -.04*** (.01) |
| Employment                                  |                       |              | -.04*** (.01) |                      |              | -.03*** (.01) |                        |              | -.01 (.01)    |
| Financial status                            |                       |              | -.02** (.01)  |                      |              | -.02** (.01)  |                        |              | .03*** (.05)  |
| Country-level covariates                    |                       |              |               |                      |              |               |                        |              |               |
| Total Population                            |                       |              | -.03 (.03)    |                      |              | .00 (.03)     |                        |              | -.03 (.03)    |
| GDP per capita                              |                       |              | -.07 (.07)    |                      |              | .00 (.06)     |                        |              | .08 (.09)     |
| Unemployment Rate                           |                       |              | -.10* (.04)   |                      |              | -.03 (.04)    |                        |              | .01 (.05)     |
| Gini Index                                  |                       |              | .07 (.07)     |                      |              | .03 (.06)     |                        |              | .22* (.08)    |
| Old Age Dependency Ratio                    |                       |              | .01 (.06)     |                      |              | .04 (.06)     |                        |              | -.03 (.08)    |
| Life Expectancy                             |                       |              | .12* (.05)    |                      |              | -.05 (.05)    |                        |              | .06 (.06)     |
| Health Expenditure                          |                       |              | .00 (.05)     |                      |              | -.02 (.05)    |                        |              | -.15 (.06)    |
| Private Health Expenditure                  |                       |              | .14 (.10)     |                      |              | .02 (.09)     |                        |              | -.19 (.12)    |
| Out-of-pocket payment                       |                       |              | -.06 (.10)    |                      |              | .06 (.09)     |                        |              | .28* (.12)    |
| Hospital Beds                               |                       |              | -.05 (.04)    |                      |              | -.08* (.03)   |                        |              | -.03 (.05)    |

**Table S8. Sensitivity Analysis: Multilevel Regression Modeling (Model 2) for low financial insecurity (n=8427)**

|                             | Hand Washing | Avoid Crowds  | Social Isolation | Mandatory Vaccination | Mandatory Quarantine | Report Cases |
|-----------------------------|--------------|---------------|------------------|-----------------------|----------------------|--------------|
| Intercept                   | -.29* (.14)  | -.20*** (.05) | -.27 (.07)       | -.20* (.07)           | -.16*** (.04)        | -.04 (.11)   |
| Control: Case-Fatality Rate | .04 (.04)    | .01 (.02)     | .02 (.03)        | .04 (.03)             | .01 (.01)            | .03 (.03)    |
| Health Risk (HR)            | .04 (.03)    | .04 (.03)     | .04** (.01)      | .06*** (.01)          | .04* (.01)           | -.02 (.02)   |
| Economic Risk (ER)          | .06* (.01)   | .06** (.02)   | .02 (.02)        | .04 (.02)             | .07*** (.01)         | .05 (.03)    |
| HR X ER                     | .01 (.25)    | .00 (.03)     | .02 (.03)        | .00 (.02)             | -.01 (.12)           | -.01 (.05)   |
| Health Risk2(HR2)           | -.01 (.01)   | -.01 (.01)    | .01 (.01)        | .00 (.04)             | .00 (.01)            | .02 (.01)    |
| HR2 X ER                    | -.01 (.02)   | .00 (.02)     | .00 (.01)        | -.01 (.01)            | .00 (.11)            | .00 (.01)    |
| Adjusted ICC                | .80          | .11           | .10              | .18                   | .76                  | .27          |

*Note: reporting unstandardized coefficients, standard errors in parentheses. \* $p < .05$ , \*\* $p < .01$ , \*\*\* $p < .001$ . All predictors are presented in the Methods section and detailed in Table S1. The models controlled for COVID-19 case-fatality rate: total COVID-19 deaths per million/ total COVID-19 cases per million. Model 2 adjusted for individual and country level covariates as follows. Individual level covariates: (i) direct exposure to someone in their personal network (self, family, friends) infected with COVID-19; (ii) perceived knowledge about the COVID-19, (iii) perceived knowledge about the economic consequences of the COVID-19; (iv) the perceived quality of the public messages received, (v) community norms about mitigation measures, and (vi) sociodemographic variables (age, gender, education, employment and financial status). Country-level covariates included (i) total population of the country (in millions), (ii) gross domestic product (GDP) per capita (in current \$US), (iii) unemployment rate estimates for 2020 (as % of the labor force), (iv) old age dependency ratio (%), (v) Gini Index, (vi) general health expenditure (as %GDP), (vii) private health expenditure (as % health expenditure), (viii) out-of-pocket health payments (as % health expenditure), (ix) number of hospital beds (per 1000 people).*

**Table S9. Fixed-effects Model**

|                                             | Hand<br>Washing | Avoid<br>Crowds | Social<br>Isolation | Mandatory<br>Vaccination | Mandatory<br>Quarantine | Report<br>Cases |
|---------------------------------------------|-----------------|-----------------|---------------------|--------------------------|-------------------------|-----------------|
| Health Risk (HR)                            | .03***(.01)     | .02***(.01)     | -.01(.00)           | .06***(.01)              | .03***(.01)             | .00(.01)        |
| Economic Risk (ER)                          | .1***(.01)      | .02***(.01)     | -.06***(.01)        | .04***(.01)              | .09***(.01)             | .05***(.01)     |
| HR X ER                                     | .02**(.01)      | .01(.01)        | .01(.01)            | .01*(.00)                | .00(.00)                | .01(.01)        |
| Health Risk <sup>2</sup> (HR <sup>2</sup> ) | -.01 **.00)     | -.01*(.00)      | .02**(.01)          | .00(.00)                 | .00(.00)                | .02***(.00)     |
| HR <sup>2</sup> X ER                        | -.00(.00)       | .00(.00)        | .00(.00)            | .00(.00)                 | .00(.00)                | .00(.00)        |

. \*  $p < .05$ , \*\*  $p < .01$ , \*\*\*  $p < .001$

**Table S10. Lasso Model**

|                                             | Hand<br>Washing | Avoid<br>Crowds | Social<br>Isolation | Mandatory<br>Vaccination | Mandatory<br>Quarantine | Report<br>Cases |
|---------------------------------------------|-----------------|-----------------|---------------------|--------------------------|-------------------------|-----------------|
| Intercept                                   | -.19*** (.02)   | -.16***(.01)    | .25*** (.03)        | -.11 * (0.05)            | -.14 *** (.03)          | -.01 (.04)      |
| Health Risk (HR)                            | .02 (.02)       | .02 * (.01)     | -.01(.01)           | .06 ***(.01)             | .03 * (.01)             | -.00 (.01)      |
| Economic Risk (ER)                          | .11***(.01)     | .01*** (.01)    | -.07***(.01)        | .04**(.01)               | .10*** (.01)            | .05 ***(.01)    |
| HR X ER                                     | .01* (.00)      | .01(.01)        | .01 (.01)           | .01*(.01)                | .00 (.00)               | .01(.01)        |
| Health Risk <sup>2</sup> (HR <sup>2</sup> ) | -.01 (.01)      | -.01 (.01)      | .02**(.01)          | .00 (.01)                | .00 (.01)               | .02***(.01)     |
| HR <sup>2</sup> X ER                        | -.01(.00)       | .00 (.00)       | .01(.01)            | .00 (.00)                | -.01 (.00)              | -.00(.00)       |

. \*  $p < .05$ , \*\*  $p < .01$ , \*\*\*  $p < .001$
